# Supplementary material for: Seven-member-ring-based electron-transporting materials for high-efficiency OLEDs
Source: Royal Society of Chemistry journal article supplement (doi:10.1039/d2ma00974a), 2023-01-01
Supplement: d2ma00974a1.pdf [file d2ma00974a1.pdf]

# Seven-Member-Ring Based Electron-Transporting Materials for High-efficiency OLEDs

Kuo-Hsien Chou <sup>a,1</sup>, Tun-Hao Chen <sup>a,1</sup>, Xian-Qing Huang <sup>a</sup>, Chia-Sheng Huang <sup>a</sup>, Chih-Hao Chang <sup>b</sup>, Chien-Tien Chen <sup>b\*</sup>, Jwo-Huei Jou <sup>a\*</sup>

*a Department of Materials Science and Engineering, National Tsing Hua University, Hsinchu, Taiwan, ROC*

*b Department of Chemistry, National Tsing Hua University, Hsinchu, Taiwan, ROC*

*\* Corresponding author: jjou@mx.nthu.edu.tw*

*\* Corresponding author: ctchen@mx.nthu.edu.tw*

*1 These authors contributed equally to this work*

## Contents:

### 1. molecular design concept of novel ETMs

Figure S1. Molecular structures of Tm3PyQ, Tm4PyQ, 3PyDQB, and 4PyDQB.

### 2. ETMs synthesis

Scheme 1. Schematic illustration of the synthesis of PP and PC.

Scheme 2. Schematic illustration of the synthesis of DPP and DPC.

### 3. DSC data and graph of the four seven-member-ring based ETMs

Figure S2. DSC data and graph of (a) DPP, (b) DPC, (c) PP, (d) PC.

### 4. Photoluminescence (PL) spectra

Figure S3. Photoluminescence (PL) spectra of (a) DPP, (b) DPC, (c) PP, (d) PC.

### 5. TGA:

Figure S4. (a)Effect of DPC and DPP on TGA. TGA curves of (b) DPC, (c) DPP.

Figure S5. (a)Effect of PP and PC on TGA. TGA curves of (b) PP, (c) PC.

### 6. HLPC

Figure S6. HPLC spectra of (a) DPP, (b) DPC, (c) PP, (d) PC.

### 7. Mass spectra for all the intermediate and final compounds

Figure S7. Mass spectra of (a) (b) intermediate compounds of DPP and DPC, (c) DPP, (d) DPC, (e) (f) intermediate compounds of PP and PC, (g) PP, (h) PC.

### 8. NMR spectra for all the intermediate and final compounds

Figure S7. <sup>1</sup>H NMR spectrums of (a) (c) (e) intermediate compounds, (g) PP, (i) PC, (k)DPP, (m) DPC. <sup>13</sup>C NMR spectrums of (b) (d) (e)intermediate compounds, (h) PP, (j) PC, (l) DPP, (n) DPC.

## 1. molecular design concept of novel ETMs

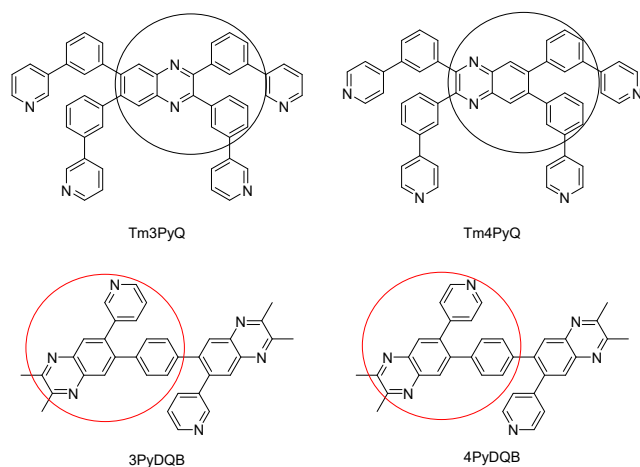

Figure S1. Molecular structures of Tm3PyQ, Tm4PyQ, 3PyDQB, and 4PyDQB.

## 2. ETMs synthesis

Scheme 1 shows the synthesis of the electron transporting materials, namely, PP and PC. 12-Chlorospiro[dibenzo[3,4:5,6]cyclohepta[1,2-b]pyridine-9,9'-fluorene](1922.9 mg, 4.5 mmol), 4-pyridineboronic acid(633.7 mg, 5.4 mmol), potassium phosphate(4776.9 mg, 22.5 mmol) were dissolved in Toluene/EtOH/H<sub>2</sub>O. The reaction mixture was heated to 100 °C for 27 h. After cooling to room temperature, the organic layer was separated to remove the solvent. The residue was purified by column chromatography (Hexane/CH<sub>2</sub>Cl<sub>2</sub>/EtOAc, 1/1/1) to give a light yellow crystalline powder, PP (1.607 g, 76.%).

Spectral Data of PP: M.W.: 470.58; <sup>1</sup>H NMR (400 MHz, CDCl<sub>3</sub>) δ 8.64 (d, J = 5.7 Hz, 2H), 8.34 (dd, J = 4.5, 1.7 Hz, 1H), 8.00 (dd, J = 7.7, 1.6 Hz, 1H), 7.92 (d, J = 2.0 Hz, 1H), 7.84 (d, J = 7.4 Hz, 1H), 7.72-7.67 (m, 4H), 7.63-7.58 (m, 3H), 7.55-7.48 (m, 3H), 7.35 (dd, J = 8.6, 2.0 Hz, 1H), 7.31-7.25 (m, 2H), 7.13 (t, J = 7.3 Hz, 1H), 6.62 (dt, J = 7.6, 1.0 Hz, 1H), 5.80 (d, J = 8.0 Hz, 1H); <sup>13</sup>C NMR (125 MHz, CDCl<sub>3</sub>) δ 160.5, 149.5, 148.6, 148.5, 148.0, 146.7, 146.3, 140.6, 140.3, 140.2, 140.1, 138.3, 137.6, 136.9, 134.6, 133.0, 132.2, 131.7, 129.8, 129.2, 129.0, 127.8, 127.6, 127.1, 125.6, 125.62, 125.57, 122.7, 121.6, 119.8, 69.1; HR-MS Calcd for C<sub>35</sub>H<sub>22</sub>N<sub>2</sub>: 470.1778, found: 470.1776; TLC R<sub>f</sub> 0.25 (Hexane/EtOAc, 2/1).

As to the PC, 12-Chlorospiro[dibenzo[3,4:5,6]cyclohepta[1,2-b]pyridine-9,9'-fluorene](2066.4 mg, 4.8 mmol), 4-cyanophenylboronic acid (853 mg, 5.8 mmol), potassium phosphate(5011.6 mg, 24.0 mmol) were dissolved in Toluene/EtOH/H<sub>2</sub>O. The reaction mixture was heated to 100 °C for 33 h. After cooling to room

temperature, the organic layer was separated to remove the solvent. The residue was purified by column chromatography (Hexane/CH<sub>2</sub>Cl<sub>2</sub>, 1/1) to give a light yellow crystalline powder, PC (1.816 g, 76.5%). The description regarding how the 12-Chlorospiro[dibenzo[3,4:5,6]cyclohepta[1,2-b]pyridine-9,9'-fluorene], is synthesized can be referred to in the supplementary information.

Spectral Data of PC: M.W.: 494.60; <sup>1</sup>H NMR (400 MHz, CDCl<sub>3</sub>) δ 8.45 (d, J = 3.3 Hz, 1H), 8.07 (d, J = 7.6 Hz, 1H), 7.87-7.85 (m, 2H), 7.71-7.50 (m, 12H), 7.34-7.25 (m, 3H), 7.14 (t, J = 7.4 Hz, 1H), 6.62 (d, J = 7.6 Hz, 1H), 5.79 (d, J = 8.1 Hz, 1H); <sup>13</sup>C NMR (125 MHz, CDCl<sub>3</sub>) δ 160.1, 148.3, 147.9, 146.3, 145.3, 144.5, 140.5, 140.4, 140.1, 139.0, 138.4, 137.3, 135.1, 132.7, 132.7, 132.6, 132.6, 132.3, 131.8, 130.0, 129.2, 129.0, 128.0, 127.9, 127.5, 127.5, 127.5, 127.2, 126.0, 125.9, 125.2, 123.0, 120.1, 120.0, 118.8, 111.1, 68.7; HR-MS Calcd for C<sub>37</sub>H<sub>22</sub>N<sub>2</sub>: 494.1778, found: 494.1777; TLC R<sub>f</sub> 0.36 (Hexane/EtOAc, 4/1).

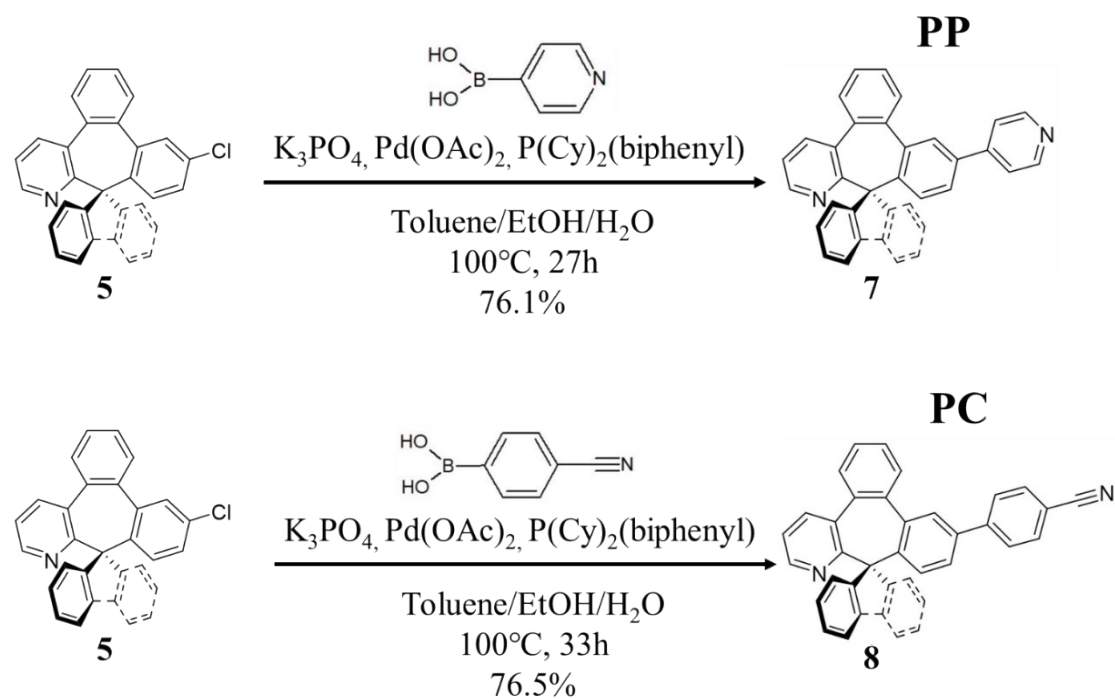

Scheme 1. Schematic illustration of the synthesis of compound 7 (PP) and compound 8 (PC), namely, 12-(Pyridin-4-yl)spiro[dibenzo[3,4:5,6]cyclohepta[1,2-b]pyridine-9,9'-fluorene] and 4-(Spiro[dibenzo[3,4:5,6]cyclohepta[1,2-b]pyridine-9,9'-fluorene]-12-yl)benzonitrile.

Scheme 2 shows the synthesis of the electron transporting materials, namely, DPP and DPC. 2',12-Dichlorospiro[dibenzo[3,4:5,6]cyclohepta[1,2-b]pyridine-9,9'-fluorene] (1664.1 mg, 3.6 mmol), 4-pyridinylboronic acid (1348.7 mg, 10.8 mmol), potassium phosphate(4617.0 mg, 21.6 mmol) were dissolved in Toluene/EtOH/H<sub>2</sub>O. The

reaction mixture was heated to 105 °C for 67 h. After cooling to room temperature, the organic layer was separated to remove the solvent. The residue was purified by column chromatography (CH<sub>2</sub>Cl<sub>2</sub>/Acetone, 2/1) to give a yellow crystalline powder, DPP (1.811 g, 91.9%).

Spectral Data of DPP: M.W.: 547.66; <sup>1</sup>H NMR (500 MHz, CDCl<sub>3</sub>) Conformer A: δ 8.64 (dd, J = 4.5, 1.2 Hz, 2H), 8.50 (d, J = 6.1 Hz, 2H), 8.35 (dd, J = 4.3, 1.8 Hz, 1H), 8.02 (dd, J = 7.9, 1.3 Hz, 1H), 7.95 (d, J = 1.8 Hz, 1H), 7.88 (d, J = 7.3 Hz, 1H), 7.72-7.68 (m, 3H), 7.67-7.65 (m, 2H), 7.61 (d, J = 7.3 Hz, 1H), 7.59-7.52 (m, 2H), 7.47 (d, J = 5.6 Hz, 2H), 7.43 (dd, J = 7.9, 1.2 Hz, 1H), 7.35 (d, J = 2.2 Hz, 1H), 7.31 (d, J = 8.6 Hz, 1H), 7.28 (dd, J = 7.7, 4.7 Hz, 1H), 6.96 (d, J = 6.1 Hz, 2H), 6.41 (d, J = 1.1 Hz, 1H); Conformer B: δ 8.68 (d, J = 6.1 Hz, 2H), 8.63 (dd, J = 4.5, 1.2 Hz, 2H), 8.33 (dd, J = 4.4, 1.4 Hz, 1H), 8.02 (dd, J = 7.9, 1.3 Hz, 1H), 7.96 (d, J = 1.8 Hz, 1H), 7.94 (d, J = 4.5 Hz, 1H), 7.93 (d, J = 1.8 Hz, 1H), 7.83 (dd, J = 8.1, 1.3 Hz, 1H), 7.77 (s, 1H), 7.76 (d, J = 2.2 Hz, 1H), 7.72-7.68 (m, 3H), 7.67-7.65 (m, 1H), 7.64-7.60 (m, 1H), 7.47 (d, J = 5.6 Hz, 2H), 7.38 (d, J = 2.0 Hz, 1H), 7.35 (d, J = 3.3 Hz, 1H), 7.30-7.27 (m, 1H), 7.16 (t, J = 7.3 Hz, 1H), 6.68 (dt, J = 7.7, 1.2 Hz, 1H), 5.84 (d, J = 8.2 Hz, 1H); <sup>13</sup>C NMR (125 MHz, CDCl<sub>3</sub>) Conformer A: δ 160.19, 150.2, 149.7, 149.4, 149.0, 148.9, 148.1, 147.1, 146.8, 145.7, 141.6, 140.3, 139.7, 139.3, 138.5, 137.8, 137.5, 136.3, 135.1, 134.6, 134.4, 133.1, 132.3, 131.7, 130.0, 129.3, 129.3, 129.2, 127.8, 126.7, 126.6, 126.2, 125.8, 124.3, 122.9, 121.5, 121.3, 120.3, 120.2, 69.1; Conformer B: δ 160.15, 150.1, 149.5, 149.4, 149.0, 148.9, 148.1, 147.0, 146.6, 145.7, 141.3, 140.2, 140.0, 139.7, 139.3, 138.4, 137.4, 137.4, 136.3, 135.1, 134.6, 134.5, 133.1, 131.7, 131.6, 129.9, 129.1, 129.0, 128.8, 128.0, 127.7, 126.6, 125.7, 125.4, 122.9, 121.7, 121.5, 120.4, 120.3, 69.2; HR-MS Calcd for C<sub>40</sub>H<sub>25</sub>N<sub>3</sub>: 547.2043, found: 547.2045; TLC R<sub>f</sub> 0.07 (Hexane/EtOAc, 2/1).

As to the DPC, 2',12-Dichlorospiro[dibenzo[3,4:5,6]cyclohepta[1,2-b]pyridine-9,9'-fluorene] (1616.5 mg, 3.5 mmol), 4-cyanophenylboronic acid (1544.0 mg, 10.5 mmol), potassium phosphate(4501.0 mg, 21.0 mmol) were dissolved in Toluene/EtOH/H<sub>2</sub>O. The reaction mixture was heated to 105 °C for 8 h. After cooling to room temperature, the organic layer was separated to remove the solvent. The residue was purified by column chromatography (Hexane/CH<sub>2</sub>Cl<sub>2</sub>, 1/2) to give a yellow crystalline powder, DPC (1.853 g, 88.9%). The description regarding how the 2',12-Dichlorospiro[dibenzo[3,4:5,6]cyclohepta[1,2-b]pyridine-9,9'-fluorene], is synthesized can be referred to in the supplementary information.

Spectral Data of DPC: M.W.: 595.71; <sup>1</sup>H NMR (500 MHz, CDCl<sub>3</sub>) Conformer A: δ 8.37 (dd, J = 4.6, 1.5 Hz, 1H), 8.04 (dd, J = 7.8, 1.5 Hz, 1H), 7.91 (s, 1H), 7.88 (s, 1H), 7.83 (d, J = 8.3 Hz, 1H), 7.75-7.65 (m, 9H), 7.61 (d, J = 7.5 Hz, 1H), 7.58-7.54 (m,

3H), 7.39 (dd,  $J = 7.9, 1.8$  Hz, 1H), 7.34-7.29 (m, 3H), 7.13 (d,  $J = 8.0$  Hz, 2H), 6.36 (d,  $J = 1.2$  Hz, 1H); Conformer B:  $\delta$  8.36 (dd,  $J = 4.6, 1.5$  Hz, 1H), 8.04 (dd,  $J = 7.8, 1.5$  Hz, 1H), 7.94 (d,  $J = 8.0$  Hz, 1H), 7.91 (s, 1H), 7.89 (s, 1H), 7.78 (dd,  $J = 8.0, 1.6$  Hz, 1H), 7.77 (d,  $J = 1.8, 1$  Hz), 7.74-7.64 (m, 9H), 7.59-7.53 (m, 3H), 7.35-7.29 (m, 3H), 7.17 (t,  $J = 7.5$  Hz, 1H), 6.68 (dt,  $J = 7.7, 1.2$  Hz, 1H), 5.85 (d,  $J = 8.1$  Hz, 1H);  $^{13}\text{C}$  NMR (125 MHz,  $\text{CDCl}_3$ ) Conformer A:  $\delta$  160.2, 149.7, 149.2, 146.8, 146.1, 145.3, 145.2, 144.3, 141.2, 140.4, 140.0, 139.4, 138.6, 138.5, 137.8, 137.4, 134.5, 133.0, 132.6, 132.3, 131.9, 131.8, 130.2, 129.2, 129.2, 127.9, 127.8, 127.5, 126.9, 126.2, 126.0, 124.5, 122.9, 120.3, 120.2, 119.0, 118.7, 111.2, 110.3, 69.1; Conformer B:  $\delta$  160.1, 149.4, 148.9, 146.6, 146.1, 145.3, 145.2, 144.3, 140.9, 140.2, 139.7, 139.4, 138.6, 138.5, 137.4, 136.3, 134.7, 133.0, 132.5, 132.3, 131.9, 131.7, 130.1, 129.1, 128.8, 128.0, 127.7, 127.5, 126.9, 125.9, 125.4, 124.5, 122.9, 120.5, 120.2, 119.0, 118.7, 111.2, 110.6, 69.2; HR-MS Calcd for  $\text{C}_{44}\text{H}_{25}\text{N}_3$ : 595.2043, found: 595.2045; TLC Rf 0.54 (Hexane/EtOAc, 2/1).

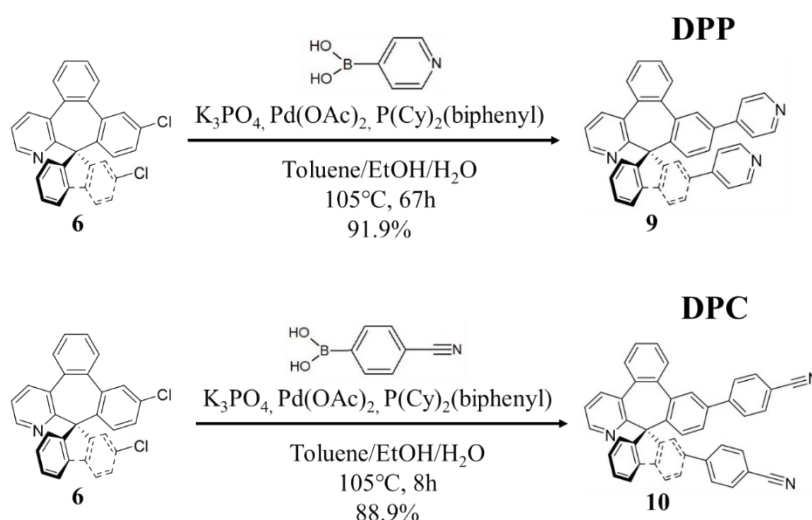

Scheme 2. Schematic illustration of the synthesis of compound 9 (DPP) and compound 10 (DPC), namely, 2',12-di(Pyridin-4-yl)spiro[dibenzo[3,4:5,6]cyclohepta[1,2-b]pyridine-9,9'-fluorene] and 4,4'-(Spiro[dibenzo[3,4:5,6]cyclohepta[1,2-b]pyridine-9,9'-fluorene]-2',12-diyl)dibenzonitrile.

### 3. DSC data and graph of the four seven-member-ring based ETMs

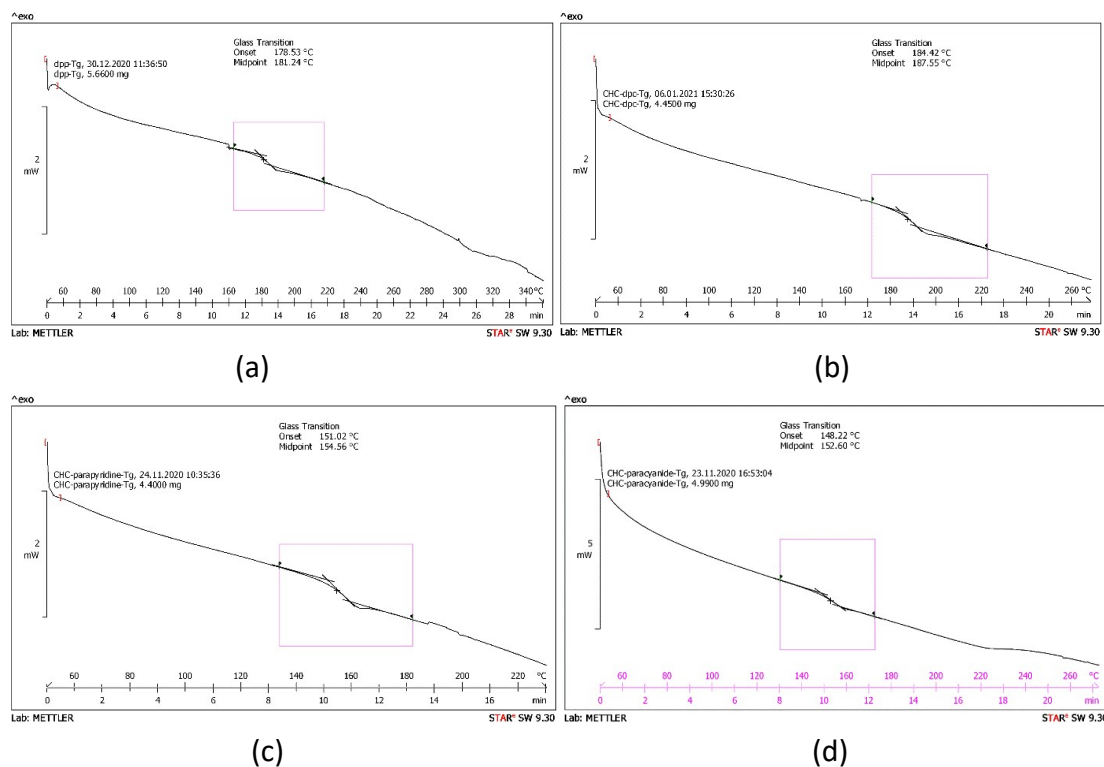

Figure S2. DSC data and graph of (a) 1-aza-DBdippy (DPP), (b) 1-aza-DBdipPhCN (DPC), (c) 1-aza-DBppy (PP), (d) 1-aza-DBpPhCN (PC).

### 4. Photoluminescence (PL) spectra

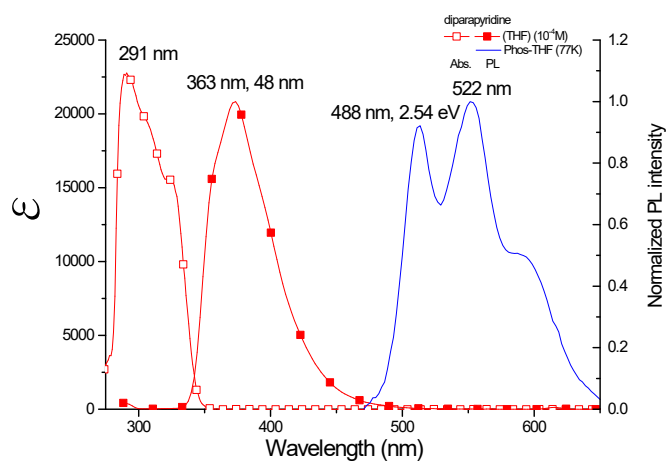

(a)

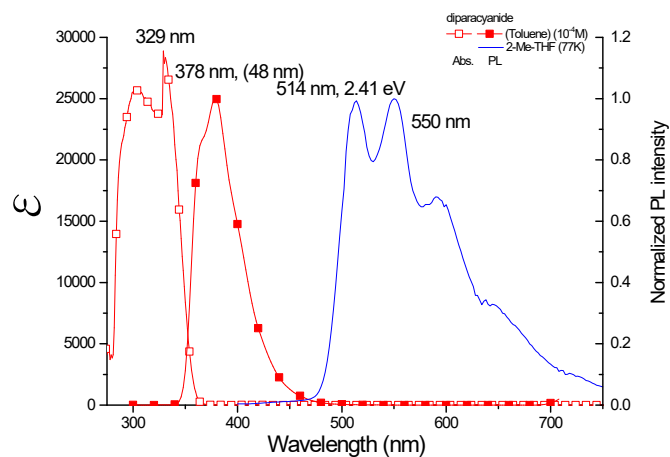

(b)

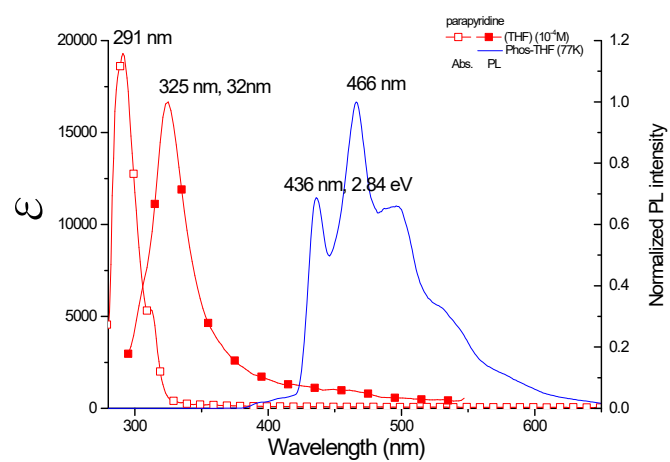

(c)

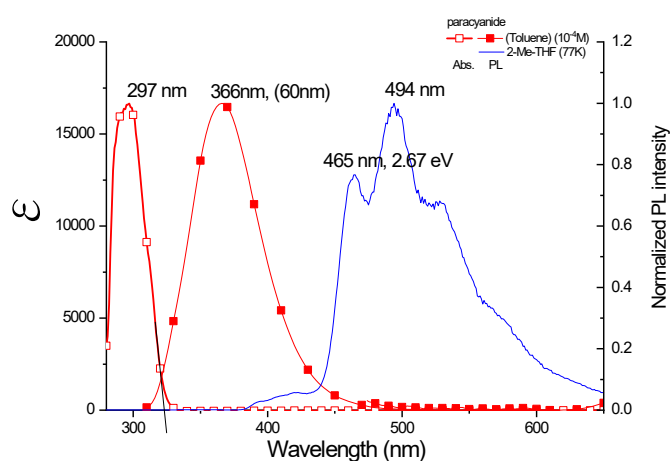

(d)

Figure S3. Photoluminescence (PL) spectra of (a) 1-aza-DBdippy (DPP), (b) 1-aza-DBdipPhCN (DPC), (c) 1-aza-DBppy (PP), (d) 1-aza-DBpPhCN (PC).

## 5. TGA:

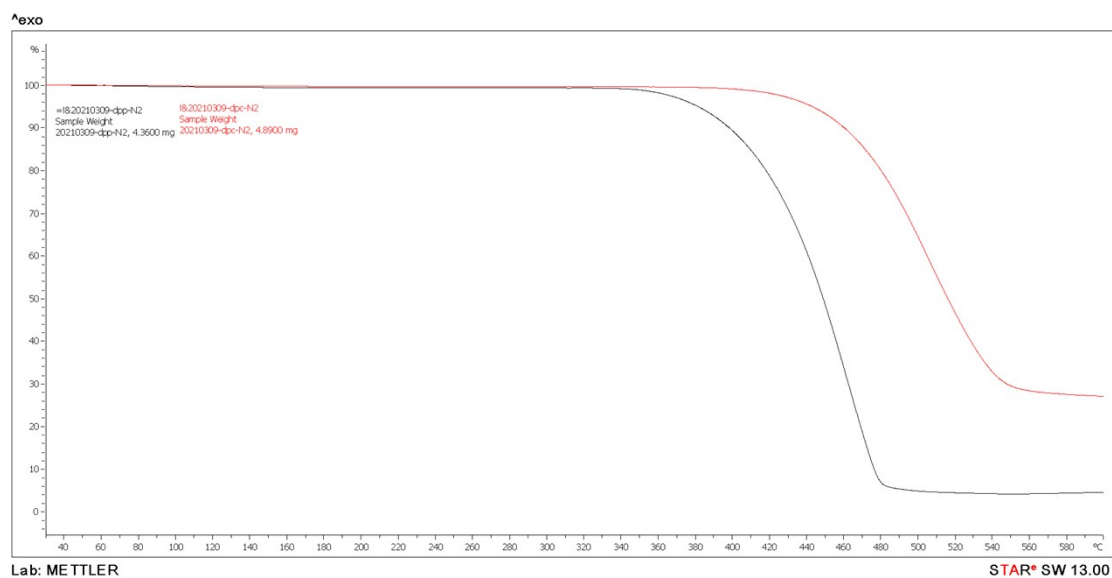

(a)

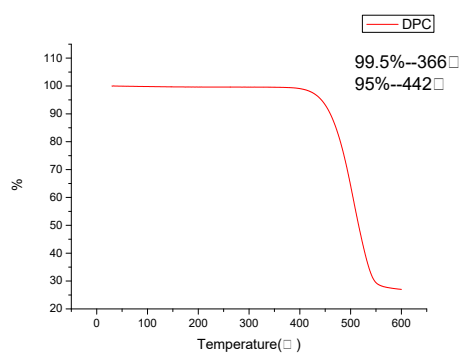

(b)

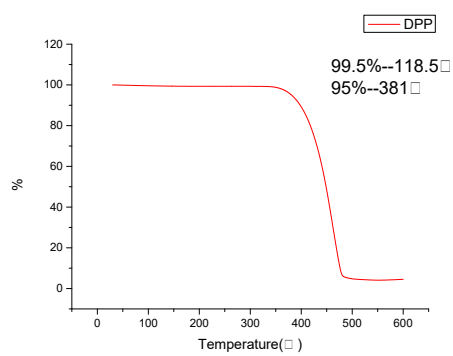

(c)

Figure S4. (a)Effect of DPC and DPP on TGA. TGA curves of (b) DPC, (c) DPP.



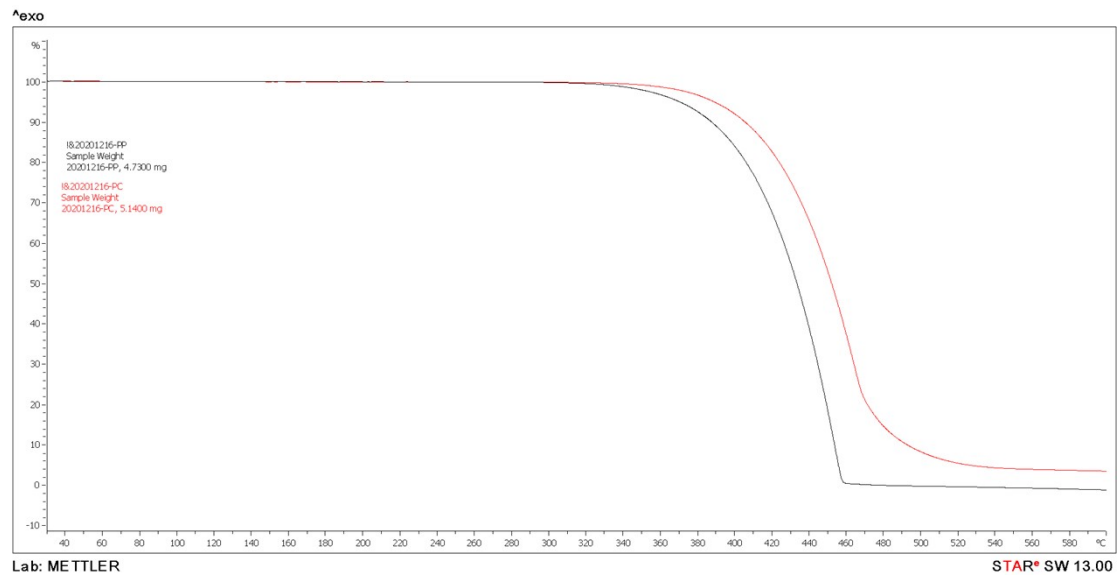

(a)

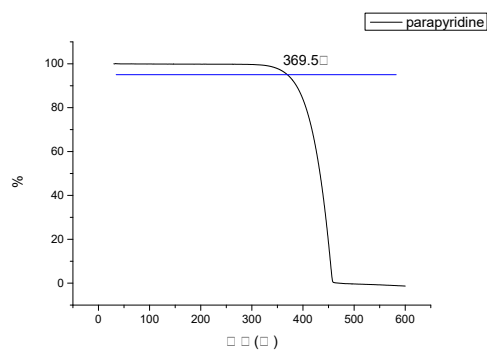

(b)

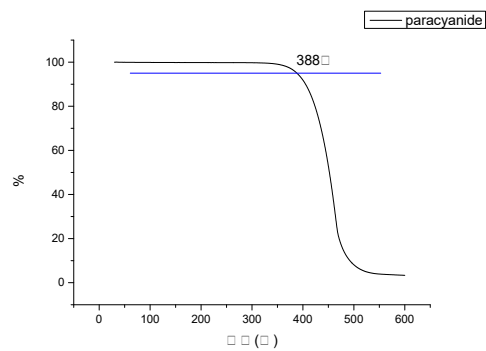

(c)

Figure S5. (a) Effect of PP and PC on TGA. TGA curves of (b) PP, (c) PC.

## 6. HPLC:

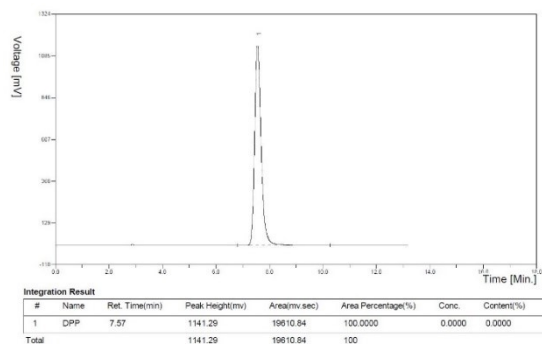

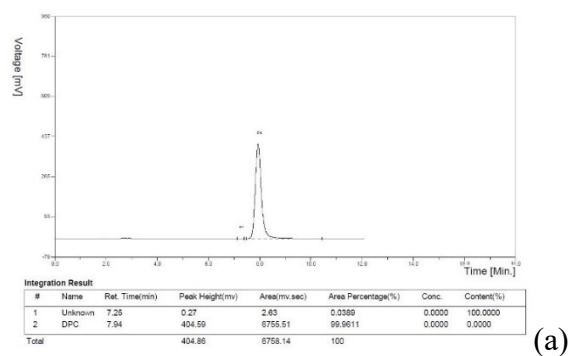

(b)

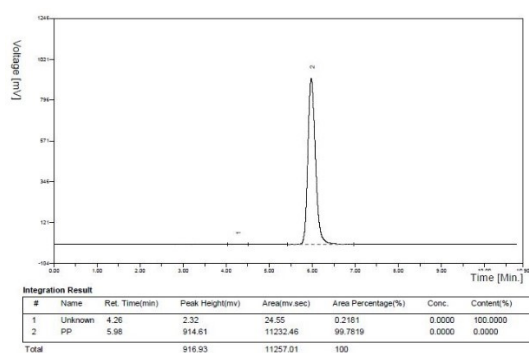

(c)

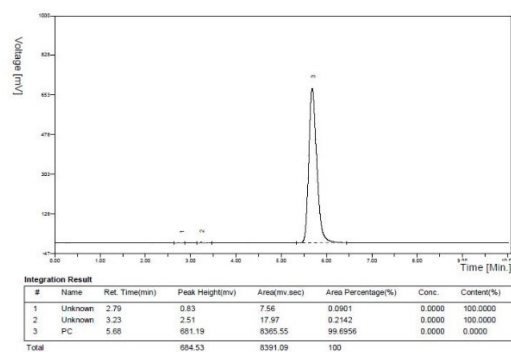

(d)

Figure S6. HPLC spectra of (a) DPP, (b) DPC, (c) PP, (d) PC.

## 7. Mass spectra for all the intermediate and final compounds

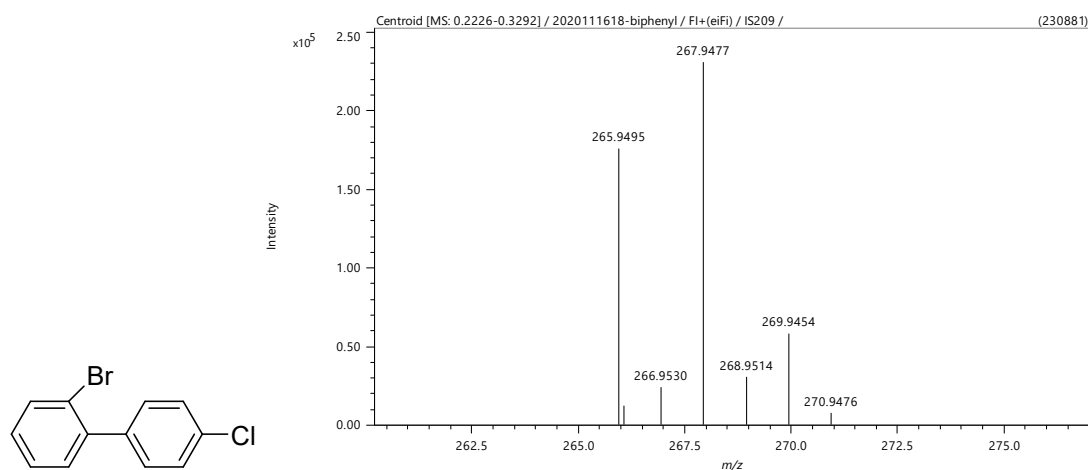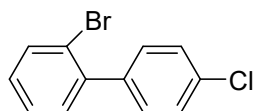

|   | Mass     | Intensity | Formula      | Calculated Mass | Mass Difference [mDa] | Mass Difference [ppm] | DBE |
|---|----------|-----------|--------------|-----------------|-----------------------|-----------------------|-----|
| ▶ | 265.9492 | 175704.54 | C12 H8 Cl Br | 265.94924       | 0.28                  | 1.05                  | 8.0 |

(a)

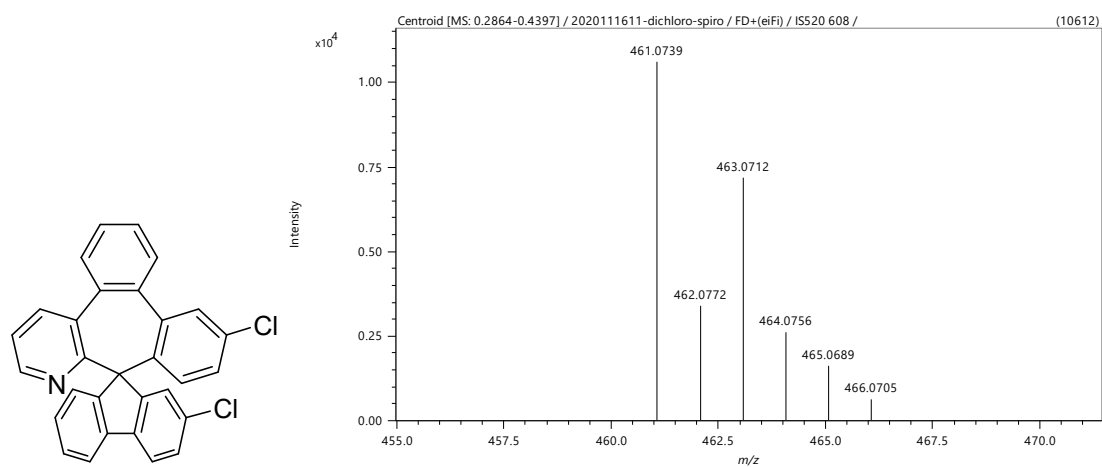

| Mass      | Intensity | Formula       | Calculated Mass | Mass Difference [mDa] | Mass Difference [ppm] | DBE  |
|-----------|-----------|---------------|-----------------|-----------------------|-----------------------|------|
| 461.07389 | 10611.86  | C30 H17 N Cl2 | 461.07326       | 0.63                  | 1.36                  | 22.0 |

(b)

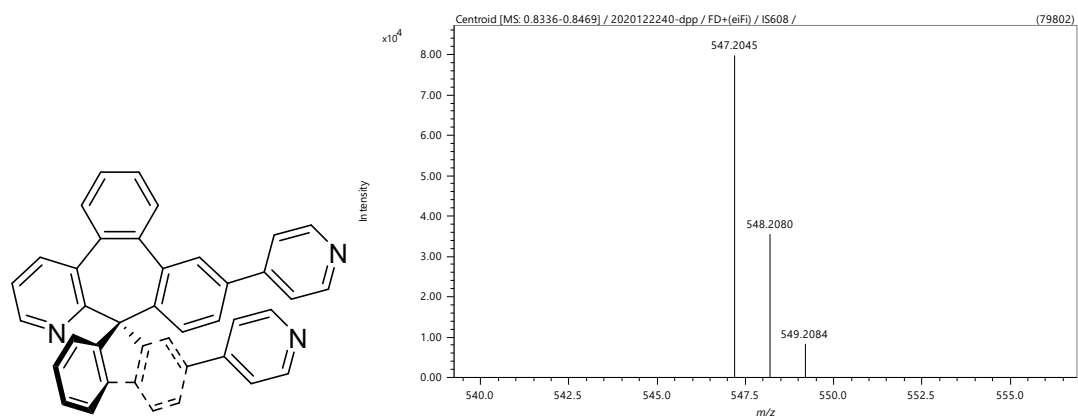

| Mass      | Intensity | Formula    | Calculated Mass | Mass Difference [mDa] | Mass Difference [ppm] | DBE  |
|-----------|-----------|------------|-----------------|-----------------------|-----------------------|------|
| 547.20446 | 79801.73  | C40 H25 N3 | 547.20430       | 0.16                  | 0.29                  | 30.0 |

(c)

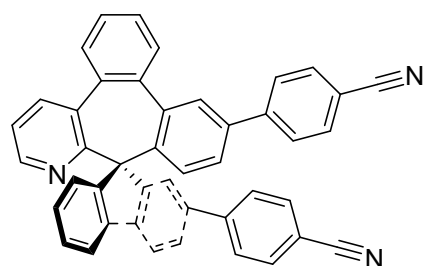

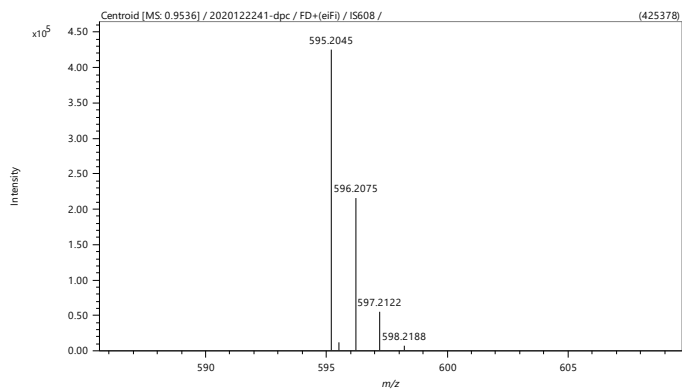

| Mass      | Intensity | Formula    | Calculated Mass | Mass Difference [mDa] | Mass Difference [ppm] | DBE  |
|-----------|-----------|------------|-----------------|-----------------------|-----------------------|------|
| 595.20453 | 425378.00 | C44 H25 N3 | 595.20430       | 0.23                  | 0.38                  | 34.0 |

(d)

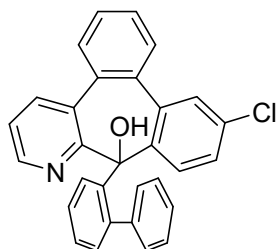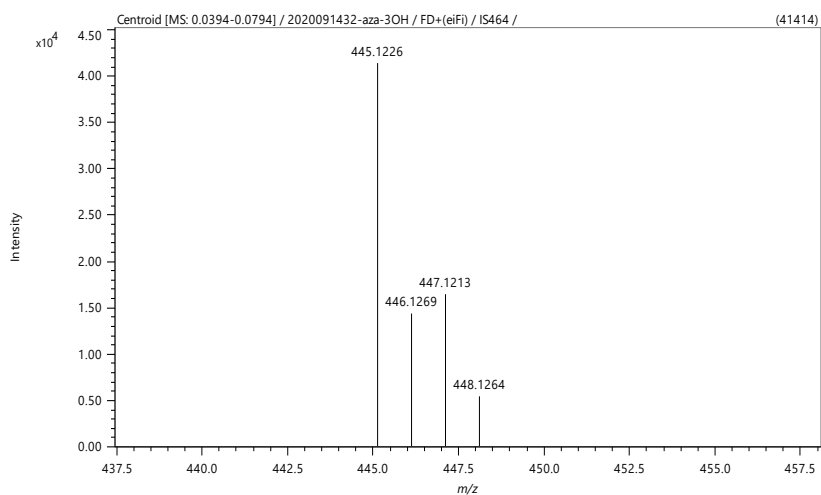

| Mass      | Intensity | Formula        | Calculated Mass | Mass Difference [mDa] | Mass Difference [ppm] | DBE  |
|-----------|-----------|----------------|-----------------|-----------------------|-----------------------|------|
| 445.12257 | 41413.68  | C30 H20 N O Cl | 445.12279       | -0.22                 | -0.49                 | 21.0 |

(e)

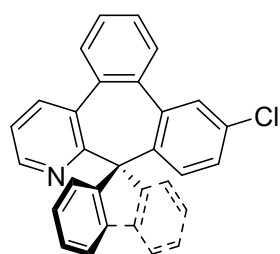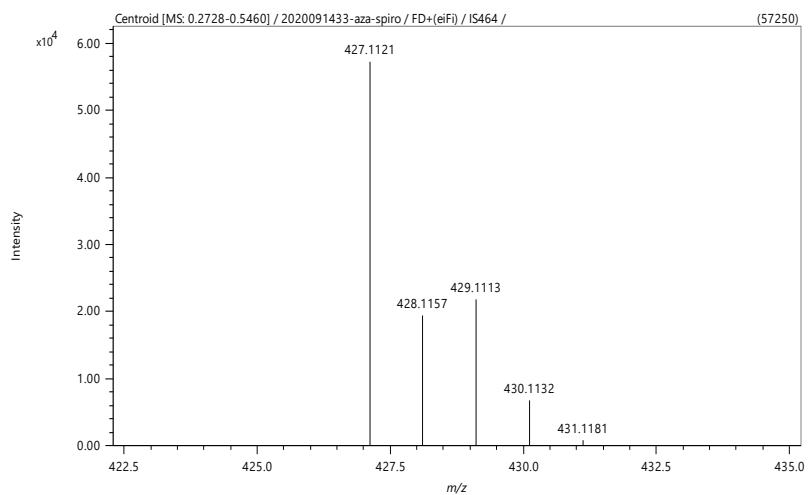

|   | Mass      | Intensity | Formula      | Calculated Mass | Mass Difference [mDa] | Mass Difference [ppm] | DBE  |
|---|-----------|-----------|--------------|-----------------|-----------------------|-----------------------|------|
| ▶ | 427.11214 | 57250.15  | C30 H18 N Cl | 427.11223       | -0.08                 | -0.20                 | 22.0 |

(f)

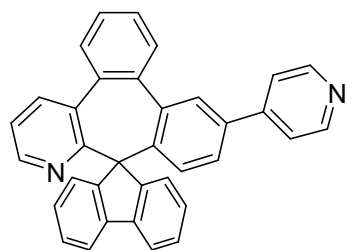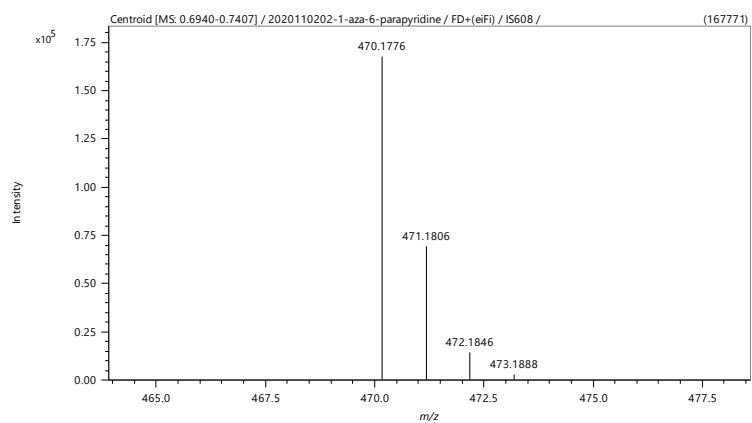

|   | Mass      | Intensity | Formula    | Calculated Mass | Mass Difference [mDa] | Mass Difference [ppm] | DBE  |
|---|-----------|-----------|------------|-----------------|-----------------------|-----------------------|------|
| ▶ | 470.17763 | 167770.92 | C35 H22 N2 | 470.17775       | -0.12                 | -0.25                 | 26.0 |

(g)

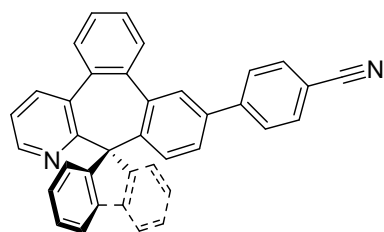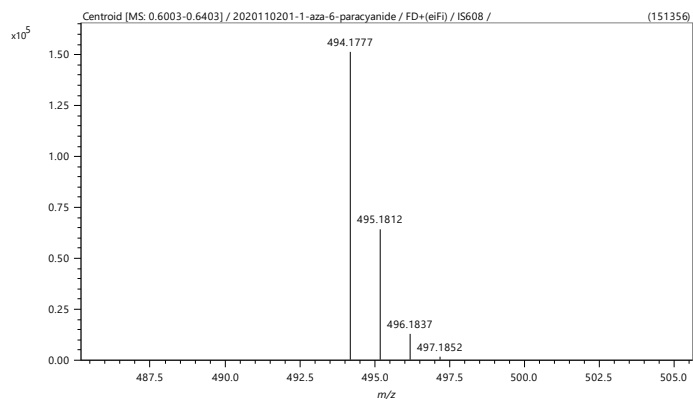

|   | Mass      | Intensity | Formula    | Calculated Mass | Mass Difference [mDa] | Mass Difference [ppm] | DBE  |
|---|-----------|-----------|------------|-----------------|-----------------------|-----------------------|------|
| ▶ | 494.17769 | 151356.24 | C37 H22 N2 | 494.17775       | -0.06                 | -0.13                 | 28.0 |

(h)

Figure S7. Mass spectra of (a) (b) intermediate compounds of DPP and DPC, (c) DPP, (d) DPC, (e) (f) intermediate compounds of PP and PC, (g) PP, (h) PC

## 9. NMR spectra for all the intermediate and final compounds

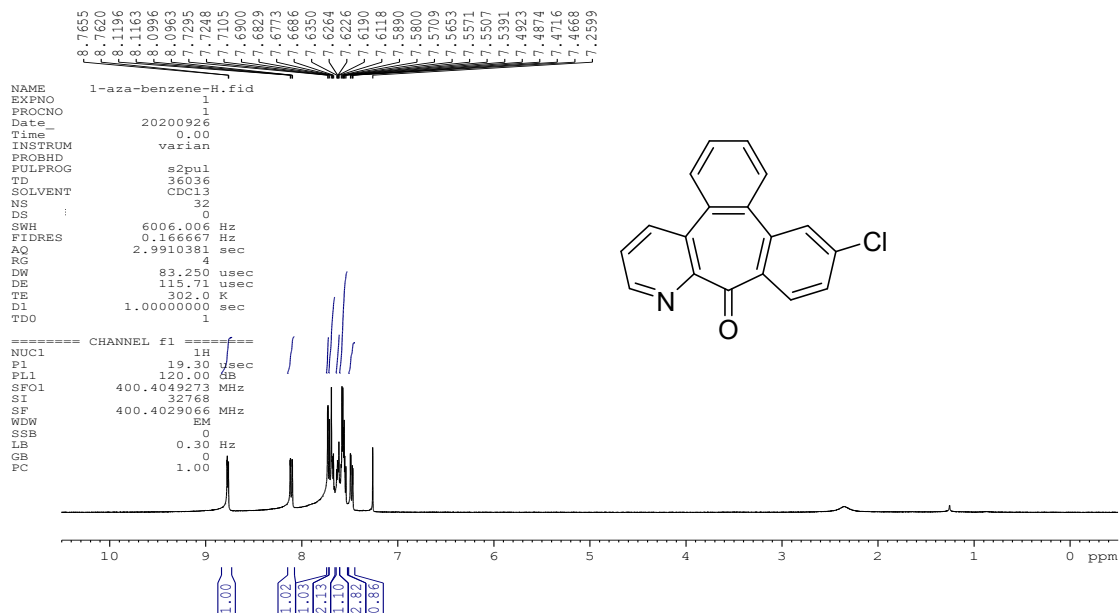

(a)

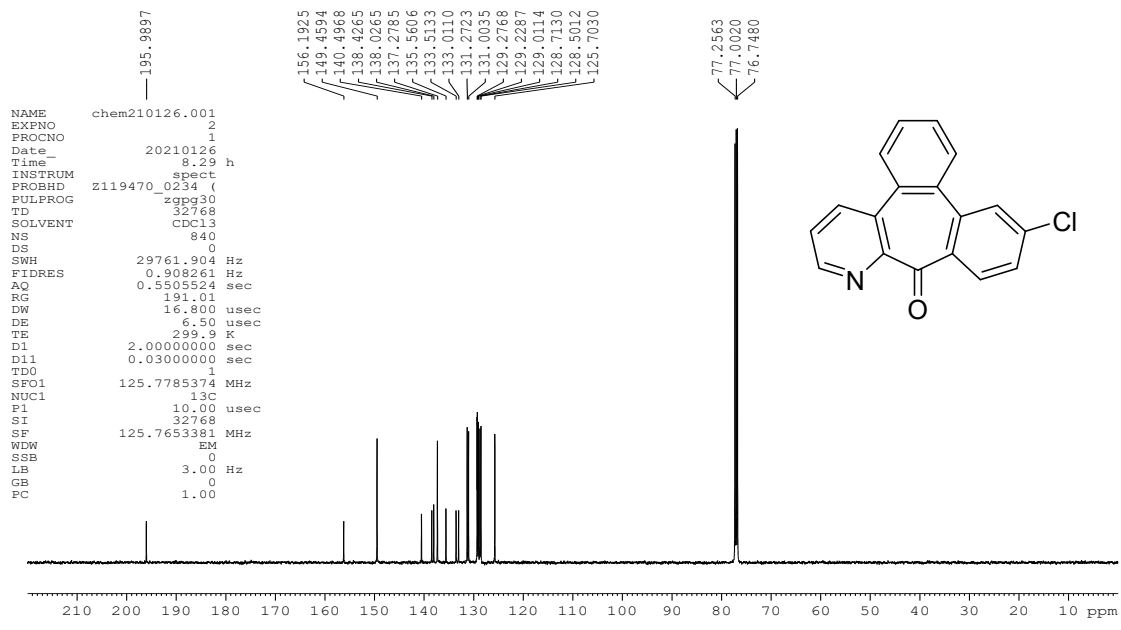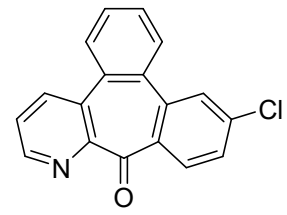

(b)

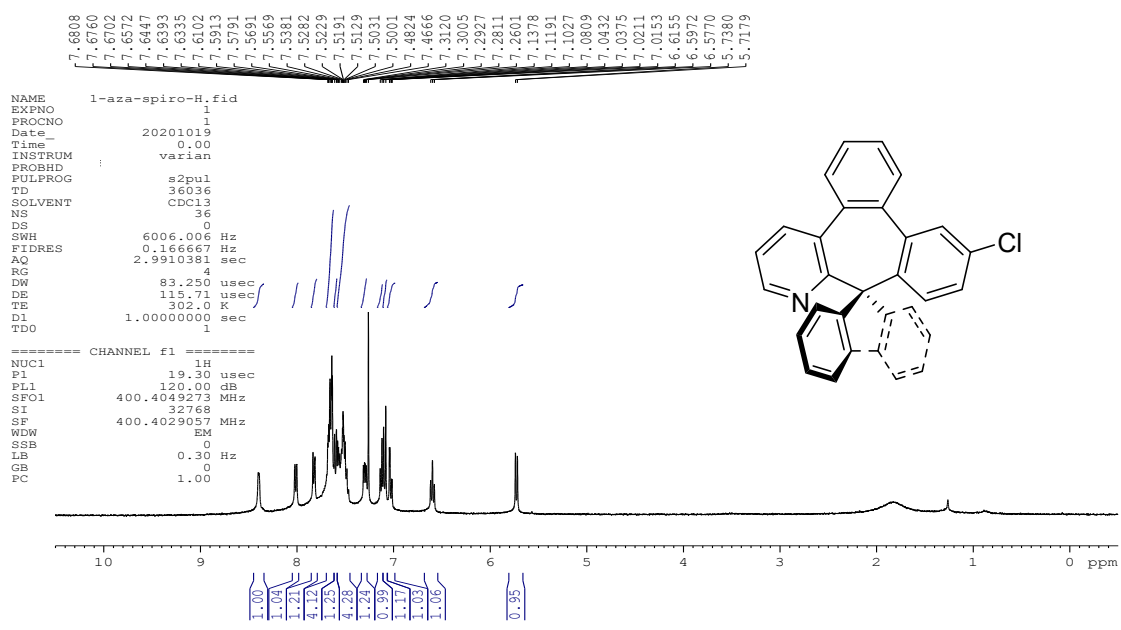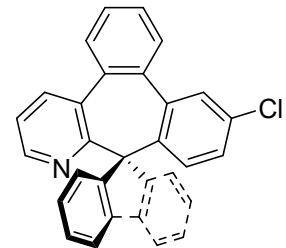

(c)

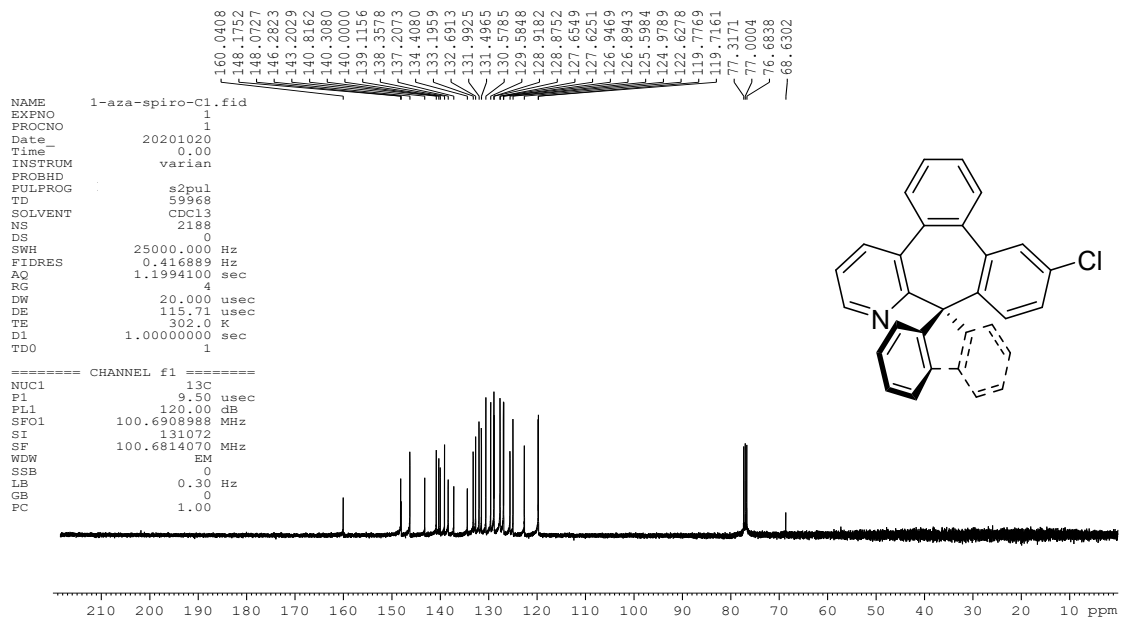

(d)

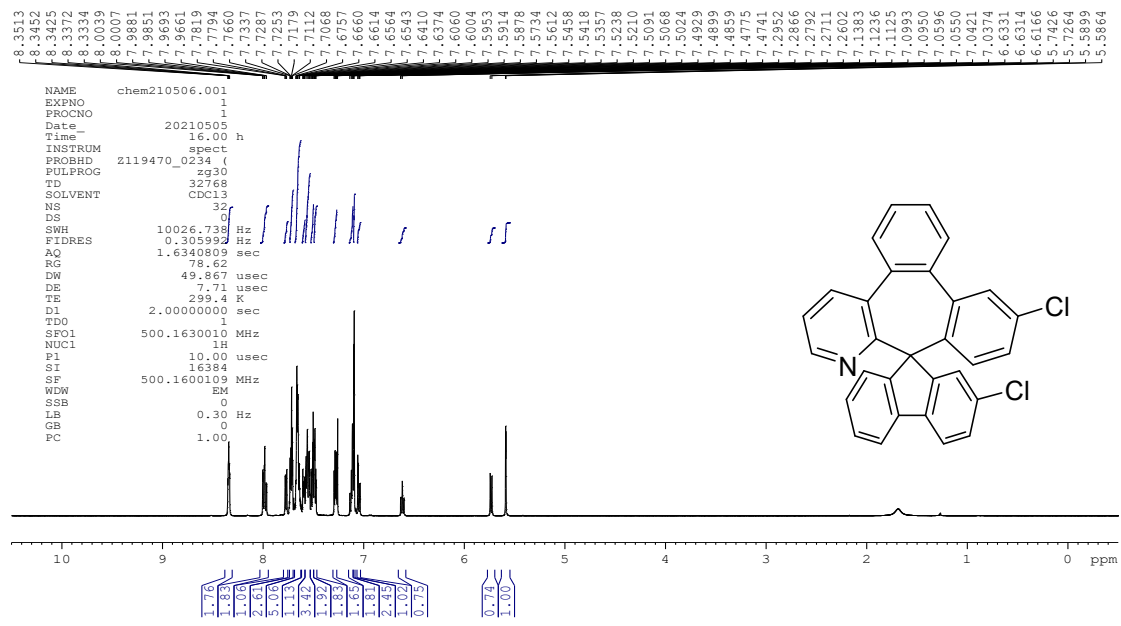

(e)



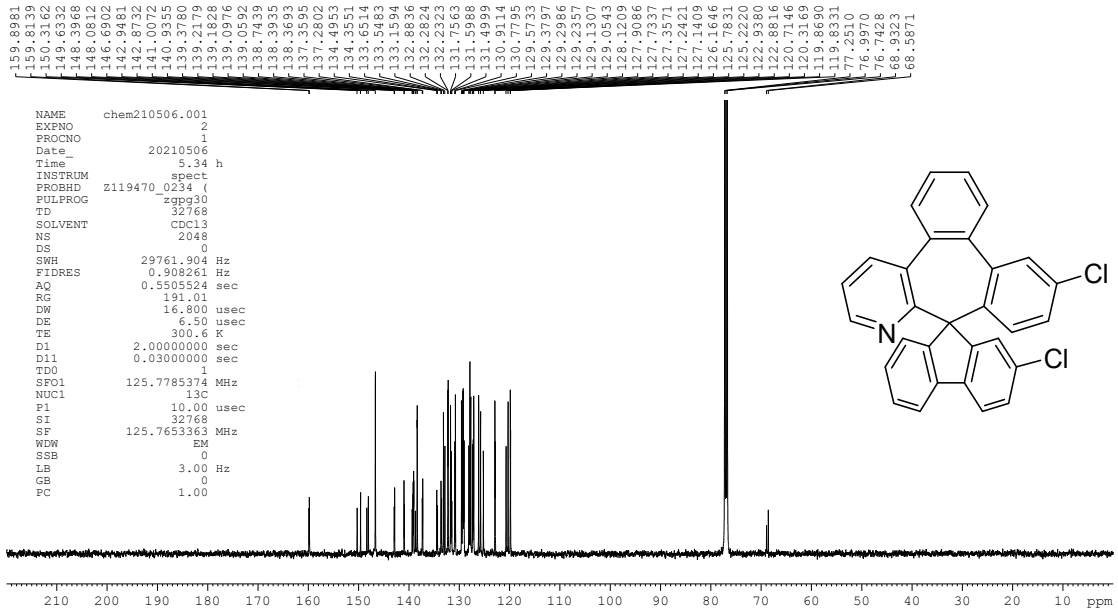

```

NAME      chem210506.001
EXPNO    2
PROCNO   1
Date_    20210506
Time     5.34 h
INSTRUM  spect
PROBHD   Z119470_0234 (
PULPROG  zgpg30
TD        32768
SOLVENT  CDCl3
NS        2048
DS        0
SWH       29761.904 Hz
FIDRES    0.908261 Hz
AQ        0.5505524 sec
RG        181.01
DW        16.800 usec
DE        6.50 usec
TE        300.6 K
D1        2.00000000 sec
D11       0.03000000 sec
TD0       1
SF01      125.7785374 MHz
NUC1      13C
P1        10.00 usec
SI        32768
SF        125.7653363 MHz
WDW       EM
SSB       0
LB        3.00 Hz
GB        0
PC        1.00
  
```

(f)

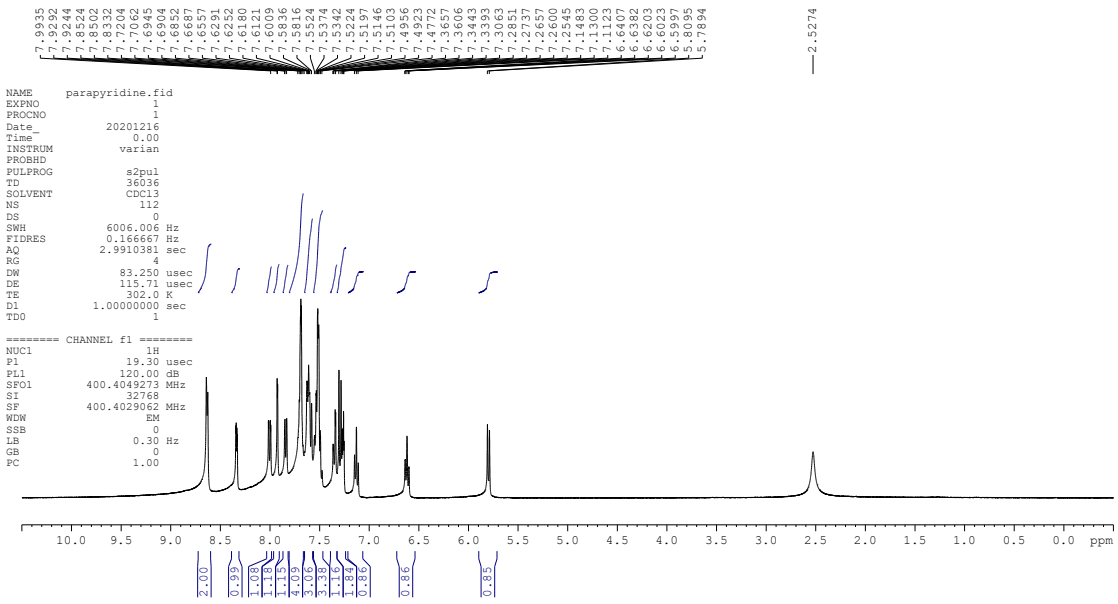

```

NAME      parapyridine.fid
EXPNO    1
PROCNO   1
Date_    20201216
Time     0.00
INSTRUM  varian
PROBHD   s2pul
PULPROG  zgpg36
TD        32768
SOLVENT  CDCl3
NS        112
DS        0
SWH       6006.006 Hz
FIDRES    0.166667 Hz
AQ        2.9910301 sec
RG        4
DW        83.250 usec
DE        115.71 usec
TE        302.0 K
D1        1.00000000 sec
TD0       1
  
```

```

===== CHANNEL f1 =====
NUC1      1H
P1        19.30 usec
PL1       120.00 db
SF01      400.4049273 MHz
SI        32768
SF        400.4029062 MHz
WDW       EM
SSB       0
LB        0.30 Hz
GB        0
PC        1.00
  
```

(g)

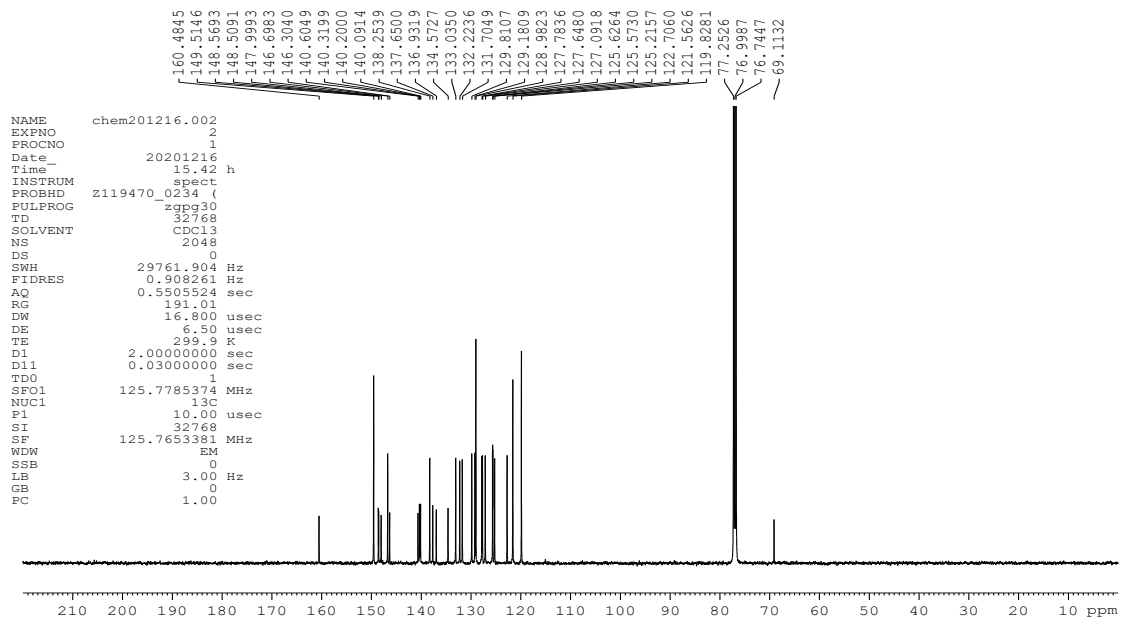

(h)

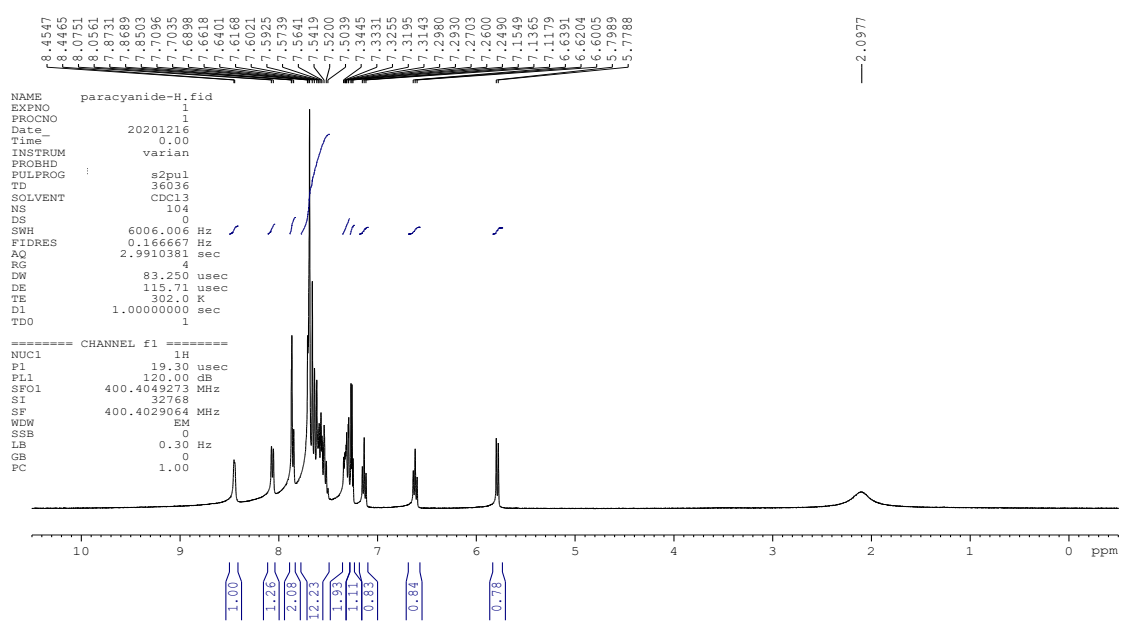

(i)

—2.0977

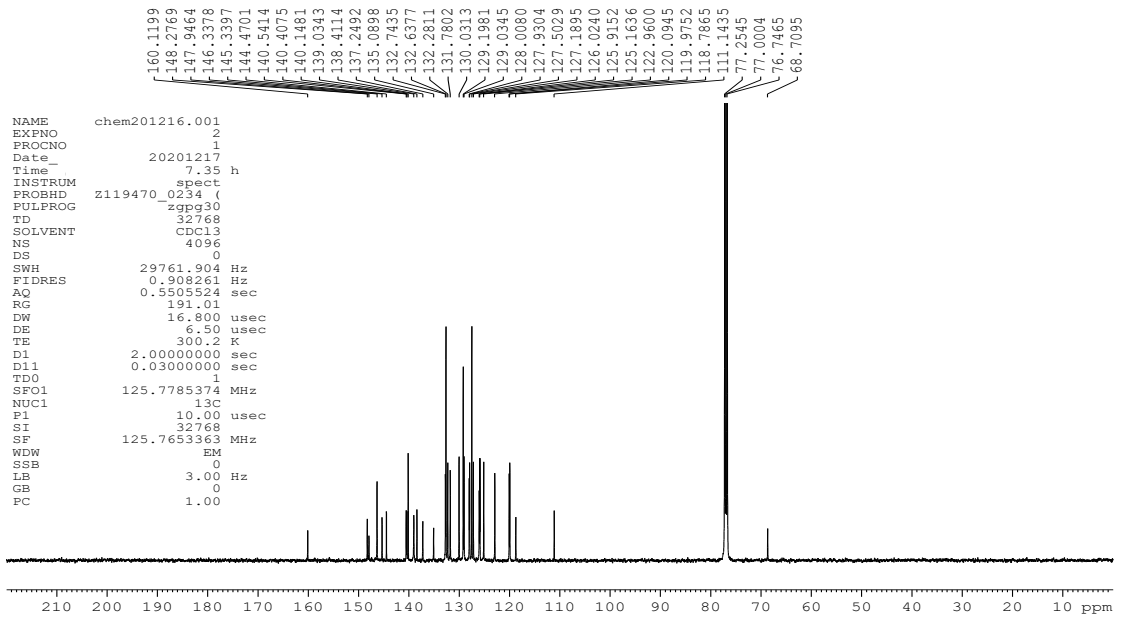

(j)

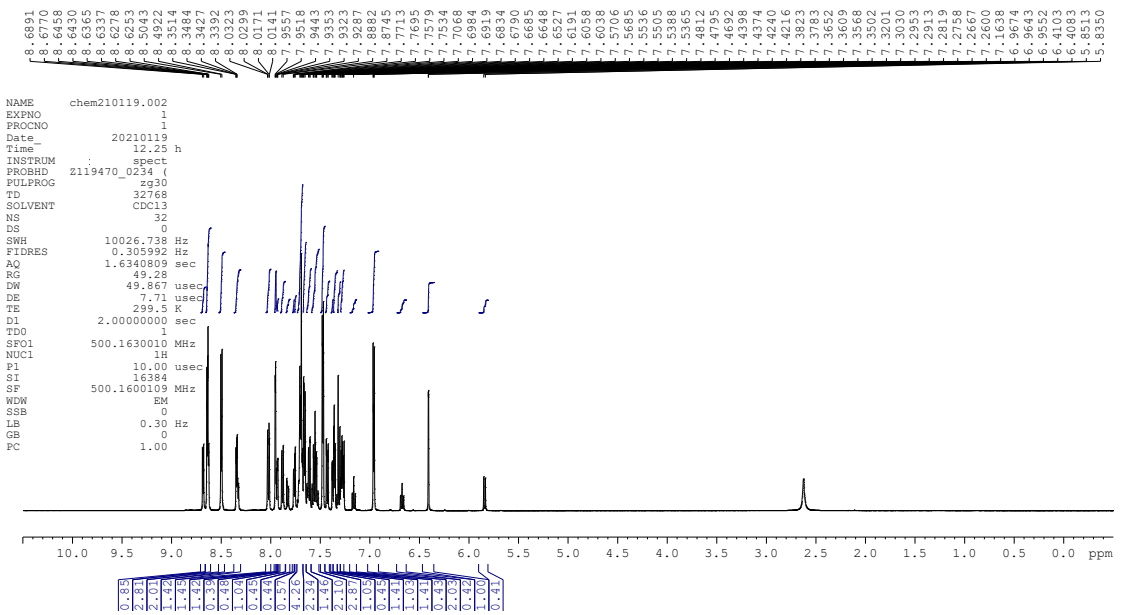

(k)

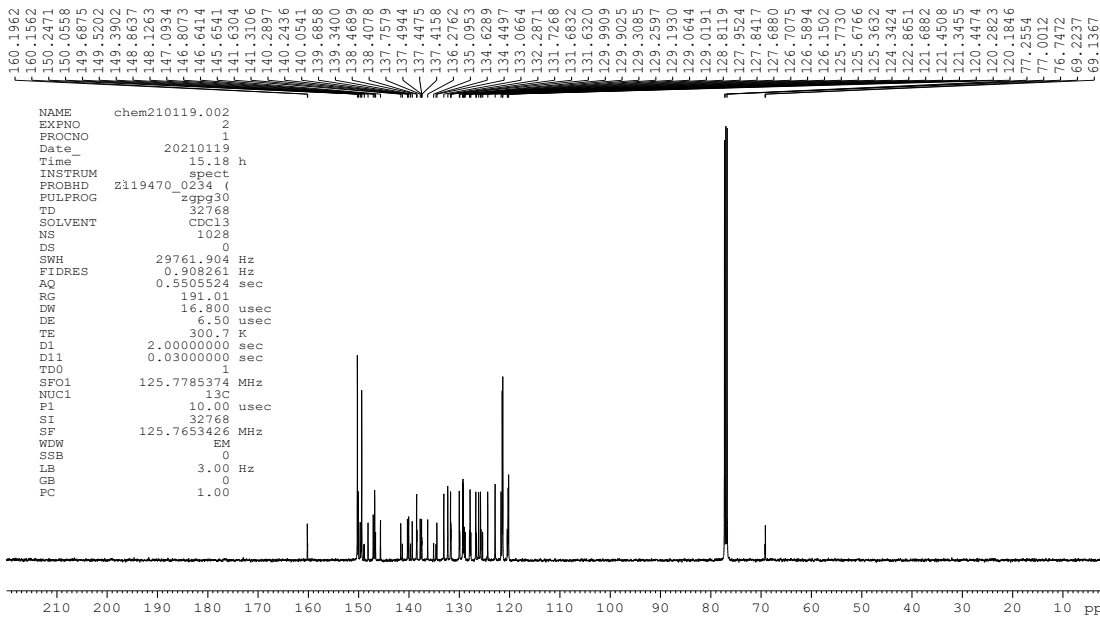

(l)

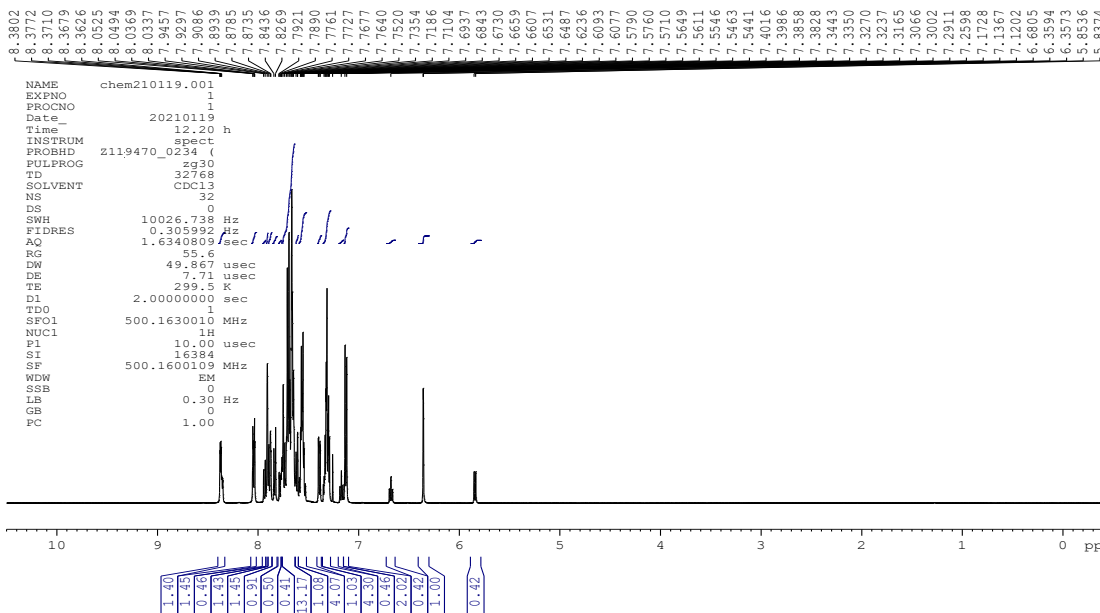

(m)

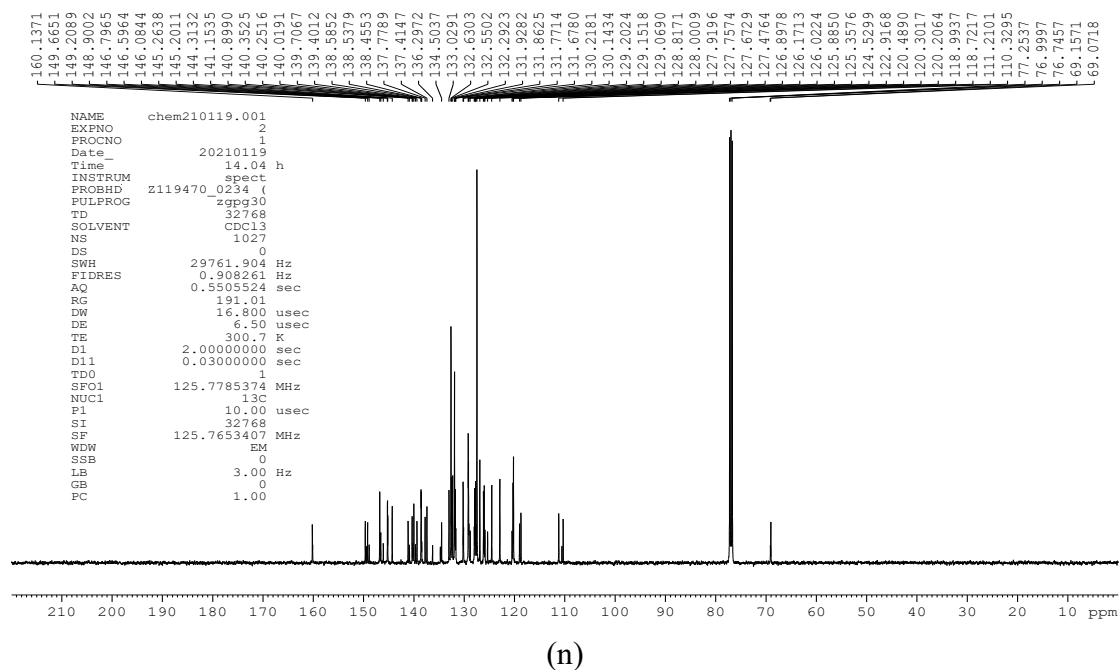

Figure S7.  $^1\text{H}$  NMR spectrums of (a) (c) (e) intermediate compounds, (g) PP, (i) PC, (k) DPP, (m) DPC.  $^{13}\text{C}$  NMR spectrums of (b) (d) (e) intermediate compounds, (h) PP, (j) PC, (l) DPP, (n) DPC.
